# Supplementary material
Source: HighWire-hosted journal article supplement (https://jitc.bmj.com/content/8/1/e000381)
Supplement: inline-supplementary-material-4 [file inline-supplementary-material-4.xlsx]

## Sheet: Sheet1
Table S2.Chi-Square Test of the correlation between each gene mutation and the objective response rate of MSK cohort patients treated with anti–PD-(L)1 based therapy.
Gene	mutation_number	mutation_frequency	chi-square P-value
TP53	113	55.122	0.0019005
ERBB4	13	6.34146	0.00250987
NTRK3	13	6.34146	0.00250987
EPHA5	20	9.7561	0.0267648
HGF	16	7.80488	0.0315234
TERT	17	8.29268	0.0315234
PTPRD	28	13.6585	0.0376456
PGR	11	5.36585	0.0392265
MGA	15	7.31707	0.0583694
ATRX	12	5.85366	0.0678019
SMARCA4	27	13.1707	0.0874594
EGFR	25	12.1951	0.0910852
ARID1A	20	9.7561	0.10186
FAT1	20	9.7561	0.10186
SMAD4	11	5.36585	0.12299
MLL3	23	11.2195	0.13395
KRAS	86	41.9512	0.1382
STK11	51	24.878	0.144276
CIC	6	2.92683	0.000133124
POLE	9	4.39024	0.000546878
AURKA	3	1.46341	0.00068109
RAD50	3	1.46341	0.00068109
BLM	6	2.92683	0.00509259
EPHB1	6	2.92683	0.00509259
FGFR4	6	2.92683	0.00509259
NOTCH1	6	2.92683	0.00509259
BRD4	2	0.97561	0.00565925
CCNE1	2	0.97561	0.00565925
CXCR4	2	0.97561	0.00565925
EZH2	2	0.97561	0.00565925
RAD51B	2	0.97561	0.00565925
AXIN1	4	1.95122	0.00714753
FLT3	4	1.95122	0.00714753
MSH6	4	1.95122	0.00714753
SPEN	4	1.95122	0.00714753
TSHR	4	1.95122	0.00714753
INPP4B	9	4.39024	0.00884585
ARID1B	7	3.41463	0.0162912
KDM5C	10	4.87805	0.0201563
IL7R	5	2.43902	0.0293054
PPP2R1A	5	2.43902	0.0293054
TET1	5	2.43902	0.0293054
DOT1L	8	3.90244	0.0386764
B2M	3	1.46341	0.0492987
CUL3	3	1.46341	0.0492987
EIF4A2	3	1.46341	0.0492987
FOXA1	3	1.46341	0.0492987
MAP2K4	3	1.46341	0.0492987
MRE11A	3	1.46341	0.0492987
NKX3-1	3	1.46341	0.0492987
PTPRS	3	1.46341	0.0492987
SDHA	3	1.46341	0.0492987
SMAD3	3	1.46341	0.0492987
ACVR1	1	0.487805	0.0509721
BCL2L1	1	0.487805	0.0509721
BMPR1A	1	0.487805	0.0509721
CD274	1	0.487805	0.0509721
CDC73	1	0.487805	0.0509721
CDK4	1	0.487805	0.0509721
CDK8	1	0.487805	0.0509721
CDKN2C	1	0.487805	0.0509721
DNAJB1	1	0.487805	0.0509721
EED	1	0.487805	0.0509721
ERG	1	0.487805	0.0509721
GNAQ	1	0.487805	0.0509721
HIST3H3	1	0.487805	0.0509721
JUN	1	0.487805	0.0509721
KMT2A	1	0.487805	0.0509721
KNSTRN	1	0.487805	0.0509721
MDM2	1	0.487805	0.0509721
NUF2	1	0.487805	0.0509721
PIK3CD	1	0.487805	0.0509721
PIK3R1	1	0.487805	0.0509721
PNRC1	1	0.487805	0.0509721
RAC2	1	0.487805	0.0509721
RAD51	1	0.487805	0.0509721
RAD51C	1	0.487805	0.0509721
RPS6KA4	1	0.487805	0.0509721
SDHAF2	1	0.487805	0.0509721
SOS1	1	0.487805	0.0509721
SOX2	1	0.487805	0.0509721
TNFAIP3	1	0.487805	0.0509721
YAP1	1	0.487805	0.0509721
YES1	1	0.487805	0.0509721
IGF1R	6	2.92683	0.0748096
MAX	6	2.92683	0.0748096
PARK2	6	2.92683	0.0748096
BCOR	10	4.87805	0.127081
ASXL1	7	3.41463	0.145367
BRCA2	7	3.41463	0.145367
DDR2	7	3.41463	0.145367
DIS3	7	3.41463	0.145367
DNMT3B	7	3.41463	0.145367
MLL	7	3.41463	0.145367
NOTCH2	7	3.41463	0.145367
PIK3C3	7	3.41463	0.145367
CD79B	4	1.95122	0.147764
FOXL2	4	1.95122	0.147764
IKZF1	4	1.95122	0.147764
INPP4A	4	1.95122	0.147764
PAX5	4	1.95122	0.147764
SOX9	4	1.95122	0.147764
TOP1	4	1.95122	0.147764
NFE2L2	7	3.41463	0.166788
ZFHX3	11	5.36585	0.193852
IRS1	6	2.92683	0.201661
NRAS	6	2.92683	0.201661
PIK3CG	15	7.31707	0.217532
BARD1	8	3.90244	0.237896
LATS1	8	3.90244	0.237896
NF2	8	3.90244	0.237896
NOTCH3	8	3.90244	0.237896
RECQL4	8	3.90244	0.237896
IDH1	5	2.43902	0.244958
INSR	5	2.43902	0.244958
NTRK2	5	2.43902	0.244958
GRIN2A	12	5.85366	0.270689
CDKN2A	12	5.85366	0.273792
CDKN2Ap16INK4A	12	5.85366	0.273792
AXIN2	5	2.43902	0.286721
CBL	5	2.43902	0.286721
ERCC5	5	2.43902	0.286721
FGF3	5	2.43902	0.286721
HIST1H1C	5	2.43902	0.286721
IGF2	5	2.43902	0.286721
JAK3	5	2.43902	0.286721
KDM5A	5	2.43902	0.286721
KDR	5	2.43902	0.286721
PIK3R2	5	2.43902	0.286721
PPM1D	5	2.43902	0.286721
RFWD2	5	2.43902	0.286721
EIF1AX	4	1.95122	0.299569
GNAS	4	1.95122	0.299569
NBN	4	1.95122	0.299569
PTCH1	4	1.95122	0.299569
CCND2	2	0.97561	0.308445
CDK12	2	0.97561	0.308445
CDK6	2	0.97561	0.308445
CDKN1A	2	0.97561	0.308445
CHEK2	2	0.97561	0.308445
DNMT1	2	0.97561	0.308445
E2F3	2	0.97561	0.308445
ERCC4	2	0.97561	0.308445
ETV6	2	0.97561	0.308445
FANCC	2	0.97561	0.308445
FGF19	2	0.97561	0.308445
FYN	2	0.97561	0.308445
GSK3B	2	0.97561	0.308445
H3F3C	2	0.97561	0.308445
HIST1H3D	2	0.97561	0.308445
HOXB13	2	0.97561	0.308445
IFNGR1	2	0.97561	0.308445
KLF4	2	0.97561	0.308445
MCL1	2	0.97561	0.308445
MDM4	2	0.97561	0.308445
NCOA3	2	0.97561	0.308445
NEGR1	2	0.97561	0.308445
PARP1	2	0.97561	0.308445
PREX2	2	0.97561	0.308445
REL	2	0.97561	0.308445
RPS6KB2	2	0.97561	0.308445
RYBP	2	0.97561	0.308445
SMAD2	2	0.97561	0.308445
CARD11	9	4.39024	0.346956
FLT4	9	4.39024	0.346956
INHBA	9	4.39024	0.346956
IRS2	9	4.39024	0.346956
NF1	21	10.2439	0.359712
BAP1	3	1.46341	0.370166
CSF1R	3	1.46341	0.370166
FOXO1	3	1.46341	0.370166
GATA1	3	1.46341	0.370166
GNA11	3	1.46341	0.370166
IRF4	3	1.46341	0.370166
MAP2K2	3	1.46341	0.370166
MITF	3	1.46341	0.370166
MYOD1	3	1.46341	0.370166
SDHB	3	1.46341	0.370166
SMARCB1	3	1.46341	0.370166
TMPRSS2	3	1.46341	0.370166
ASXL2	6	2.92683	0.445975
CDKN2Ap14ARF	6	2.92683	0.445975
FANCA	6	2.92683	0.445975
FBXW7	6	2.92683	0.445975
GLI1	6	2.92683	0.445975
LATS2	6	2.92683	0.445975
MAP3K1	6	2.92683	0.445975
MED12	6	2.92683	0.445975
MTOR	6	2.92683	0.445975
NTRK1	6	2.92683	0.445975
RICTOR	6	2.92683	0.445975
RNF43	6	2.92683	0.445975
TGFBR1	6	2.92683	0.445975
ATM	18	8.78049	0.450579
MLL2	18	8.78049	0.450579
AMER1	9	4.39024	0.461161
PBRM1	9	4.39024	0.461161
ARID2	14	6.82927	0.462899
AKT3	2	0.97561	0.46544
ALOX12B	2	0.97561	0.46544
ANKRD11	2	0.97561	0.46544
ARAF	2	0.97561	0.46544
ARID5B	2	0.97561	0.46544
BCL2	2	0.97561	0.46544
BCL6	2	0.97561	0.46544
CENPA	2	0.97561	0.46544
CSF3R	2	0.97561	0.46544
CTLA4	2	0.97561	0.46544
DAXX	2	0.97561	0.46544
ERRFI1	2	0.97561	0.46544
FGFR1	2	0.97561	0.46544
FH	2	0.97561	0.46544
FUBP1	2	0.97561	0.46544
GPS2	2	0.97561	0.46544
HIST1H3B	2	0.97561	0.46544
HIST1H3G	2	0.97561	0.46544
HNF1A	2	0.97561	0.46544
IL10	2	0.97561	0.46544
MPL	2	0.97561	0.46544
MYC	2	0.97561	0.46544
PHOX2B	2	0.97561	0.46544
PIK3CB	2	0.97561	0.46544
POLD1	2	0.97561	0.46544
PTEN	2	0.97561	0.46544
RPTOR	2	0.97561	0.46544
SRC	2	0.97561	0.46544
TRAF2	2	0.97561	0.46544
XPO1	2	0.97561	0.46544
BRIP1	10	4.87805	0.466609
MDC1	10	4.87805	0.466609
EPHA7	14	6.82927	0.529829
RB1	14	6.82927	0.529829
KIT	8	3.90244	0.552219
FLT1	11	5.36585	0.591451
PDGFRA	11	5.36585	0.591451
AXL	3	1.46341	0.592706
CRLF2	3	1.46341	0.592706
CTCF	3	1.46341	0.592706
ERBB3	3	1.46341	0.592706
ERCC2	3	1.46341	0.592706
ETV1	3	1.46341	0.592706
FAM46C	3	1.46341	0.592706
GATA3	3	1.46341	0.592706
ICOSLG	3	1.46341	0.592706
MAP2K1	3	1.46341	0.592706
NUP93	3	1.46341	0.592706
PLCG2	3	1.46341	0.592706
PTPN11	3	1.46341	0.592706
RUNX1	3	1.46341	0.592706
SOX17	3	1.46341	0.592706
U2AF1	3	1.46341	0.592706
PTPRT	24	11.7073	0.596688
AKT2	1	0.487805	0.606644
BBC3	1	0.487805	0.606644
BCL10	1	0.487805	0.606644
CASP8	1	0.487805	0.606644
CDC42	1	0.487805	0.606644
CDH1	1	0.487805	0.606644
CDKN1B	1	0.487805	0.606644
CEBPA	1	0.487805	0.606644
CHEK1	1	0.487805	0.606644
CYSLTR2	1	0.487805	0.606644
DROSHA	1	0.487805	0.606644
ELF3	1	0.487805	0.606644
FAM175A	1	0.487805	0.606644
FGF4	1	0.487805	0.606644
FGFR2	1	0.487805	0.606644
HIST1H3C	1	0.487805	0.606644
HIST1H3E	1	0.487805	0.606644
HIST1H3H	1	0.487805	0.606644
HIST1H3I	1	0.487805	0.606644
HIST1H3J	1	0.487805	0.606644
HLA-A	1	0.487805	0.606644
INHA	1	0.487805	0.606644
INSRR	1	0.487805	0.606644
JAK1	1	0.487805	0.606644
MALT1	1	0.487805	0.606644
MEF2B	1	0.487805	0.606644
MST1	1	0.487805	0.606644
MYCL1	1	0.487805	0.606644
NPM1	1	0.487805	0.606644
PIM1	1	0.487805	0.606644
PMS2	1	0.487805	0.606644
PPP6C	1	0.487805	0.606644
RAD21	1	0.487805	0.606644
RAD51D	1	0.487805	0.606644
RAD54L	1	0.487805	0.606644
RAF1	1	0.487805	0.606644
RARA	1	0.487805	0.606644
RASA1	1	0.487805	0.606644
RHEB	1	0.487805	0.606644
RHOA	1	0.487805	0.606644
SDHC	1	0.487805	0.606644
SH2B3	1	0.487805	0.606644
SHQ1	1	0.487805	0.606644
SLX4	1	0.487805	0.606644
SMARCD1	1	0.487805	0.606644
SRSF2	1	0.487805	0.606644
STAT3	1	0.487805	0.606644
STAT5B	1	0.487805	0.606644
STK40	1	0.487805	0.606644
SUFU	1	0.487805	0.606644
SYK	1	0.487805	0.606644
TAP1	1	0.487805	0.606644
TCF3	1	0.487805	0.606644
TCF7L2	1	0.487805	0.606644
TP53BP1	1	0.487805	0.606644
TSC1	1	0.487805	0.606644
ZRSR2	1	0.487805	0.606644
ATR	7	3.41463	0.610148
SF3B1	7	3.41463	0.610148
TGFBR2	7	3.41463	0.610148
PIK3CA	13	6.34146	0.614879
SETD2	13	6.34146	0.614879
KEAP1	47	22.9268	0.627056
ABL1	7	3.41463	0.662569
AR	7	3.41463	0.662569
BRCA1	7	3.41463	0.662569
DNMT3A	7	3.41463	0.662569
MST1R	7	3.41463	0.662569
NKX2-1	7	3.41463	0.662569
RET	7	3.41463	0.662569
TP63	7	3.41463	0.662569
NOTCH4	16	7.80488	0.67239
ALK	12	5.85366	0.711734
CREBBP	12	5.85366	0.711734
PIK3C2G	12	5.85366	0.711734
MET	12	5.85366	0.717037
EPHA3	22	10.7317	0.742356
NCOR1	8	3.90244	0.76959
TET2	8	3.90244	0.76959
BTK	6	2.92683	0.796911
EP300	6	2.92683	0.796911
ESR1	6	2.92683	0.796911
NSD1	6	2.92683	0.796911
PAK1	6	2.92683	0.796911
SMO	6	2.92683	0.796911
APC	11	5.36585	0.821358
CTNNB1	11	5.36585	0.821358
DICER1	4	1.95122	0.837526
FOXP1	4	1.95122	0.837526
JAK2	4	1.95122	0.837526
MAP3K13	4	1.95122	0.837526
MEN1	4	1.95122	0.837526
MYCN	4	1.95122	0.837526
PALB2	4	1.95122	0.837526
PDCD1	4	1.95122	0.837526
PIK3R3	4	1.95122	0.837526
PMS1	4	1.95122	0.837526
ROS1	4	1.95122	0.837526
SH2D1A	4	1.95122	0.837526
STAG2	4	1.95122	0.837526
TSC2	4	1.95122	0.837526
WT1	4	1.95122	0.837526
PAK7	13	6.34146	0.839969
RBM10	25	12.1951	0.908694
BRAF	9	4.39024	0.918926
ERBB2	10	4.87805	0.94443
TBX3	10	4.87805	0.94443
GATA2	5	2.43902	0.961182
KDM6A	5	2.43902	0.961182
MSH2	5	2.43902	0.961182
MUTYH	5	2.43902	0.961182
PDGFRB	5	2.43902	0.961182
PLK2	5	2.43902	0.961182
TRAF7	5	2.43902	0.961182
